# Supplementary material for: Measurement report: Molecular-level investigation of atmospheric cluster ions at the tropical high-altitude research station Chacaltaya (5240 m a.s.l.) in the Bolivian Andes
Source: Copernicus journal article supplement (doi:10.5194/egusphere-2022-1182), 2022-12-14
Supplement: Supplementary file 1 [file egusphere-2022-1182-supplement.pdf]

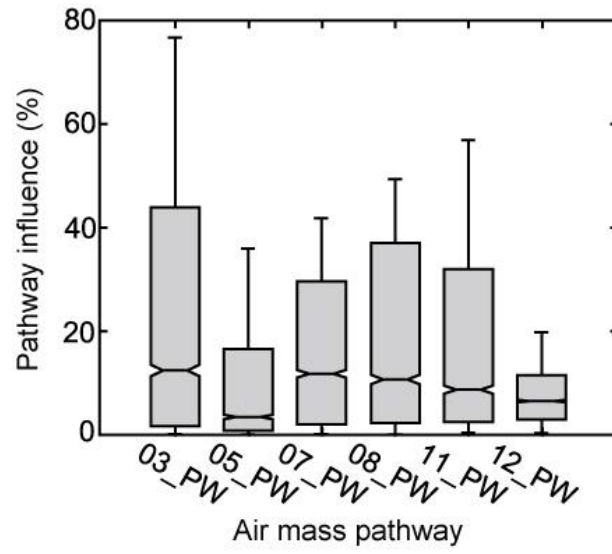

1

2 Figure S1 Influence of different pathways (SRR[%]pathway) averaged over the 5-month campaign.

3

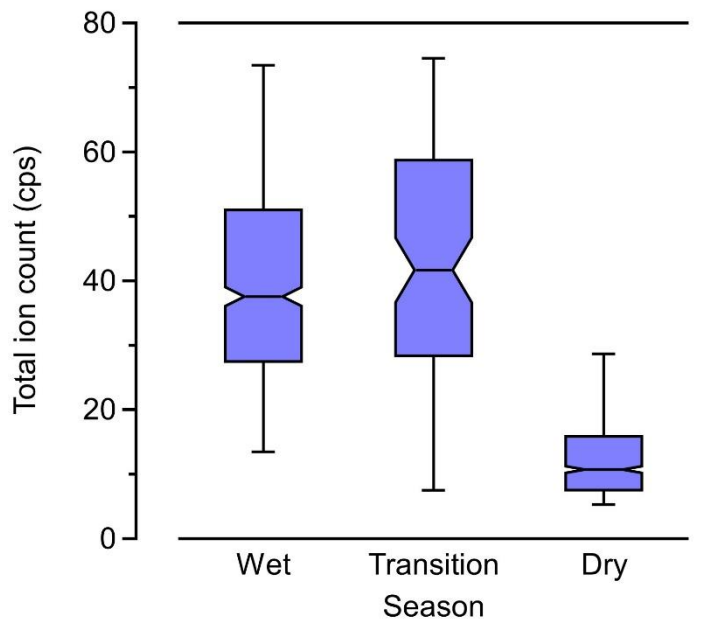

4

5 Figure S2 The TIC of negative ions measured by the APi-TOF in the wet, wet-to-dry transition, and dry  
6 seasons at the CHC. Data are in 1-hour time resolution.

7

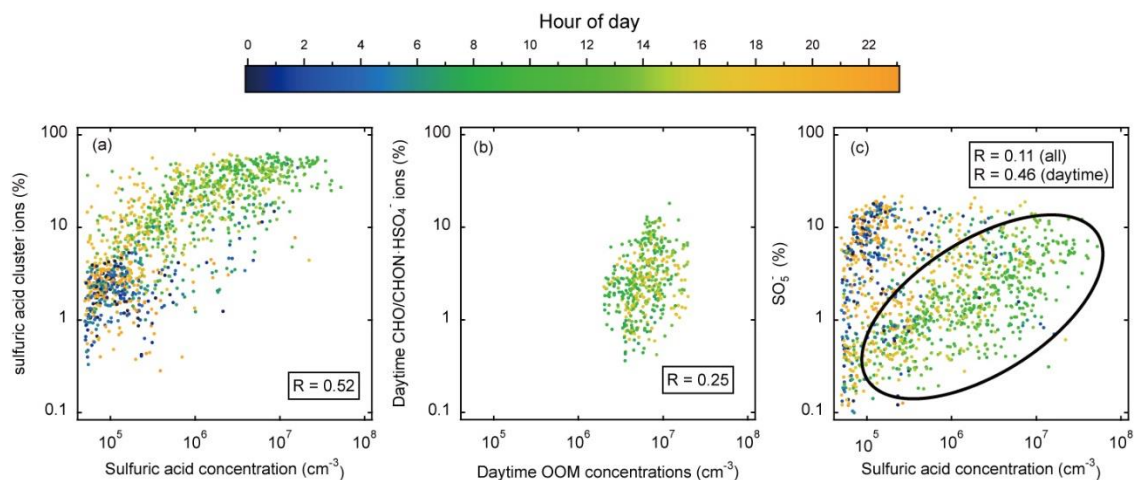

8

9 Figure S3 Relationships between (a) concentration of neutral H<sub>2</sub>SO<sub>4</sub> and signal fraction of the (H<sub>2</sub>SO<sub>4</sub>)<sub>0-3</sub>·HSO<sub>4</sub><sup>-</sup> ion group; (b) daytime concentration of OOM and signal fraction of CHO/CHON·HSO<sub>4</sub><sup>-</sup>; and  
 10  
 11 (c) concentration of H<sub>2</sub>SO<sub>4</sub> and signal fraction of SO<sub>5</sub><sup>-</sup>. The black circle in panel (d) denotes the “daytime  
 12 branch” of data points. The signal fractions of (H<sub>2</sub>SO<sub>4</sub>)<sub>0-3</sub>·HSO<sub>4</sub><sup>-</sup> and SO<sub>5</sub><sup>-</sup> ion groups were measured with  
 13 the APi-TOF. Concentration of H<sub>2</sub>SO<sub>4</sub> was measured with the CI-APi-TOF.

14

15

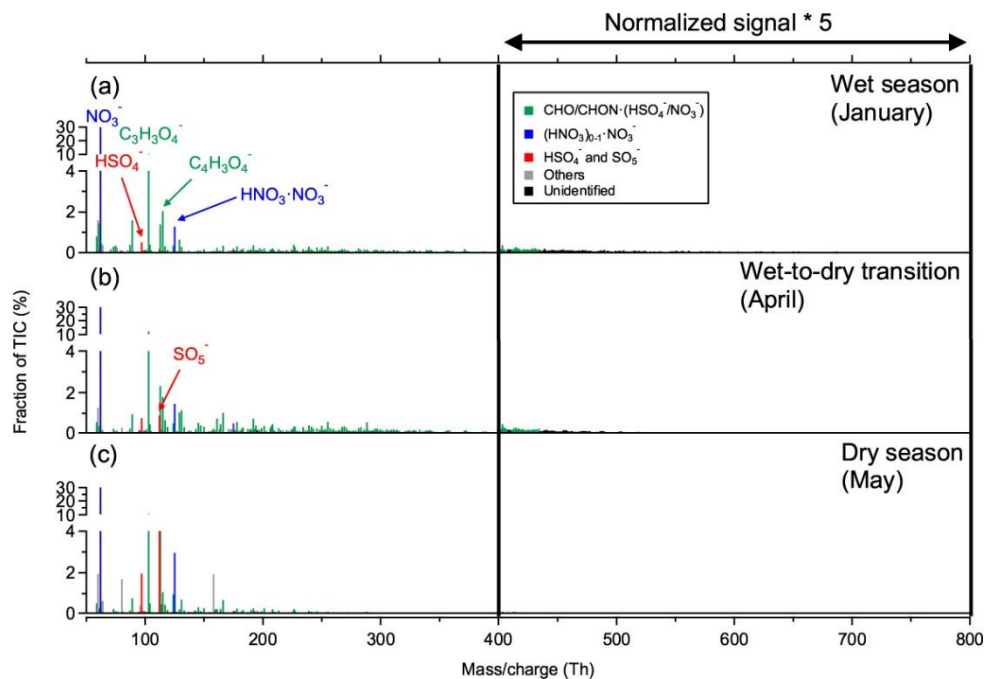

16

17 Figure S4 Mass spectra of negative ions at CHC averaged between 19:00 – 07:00 in (a) wet season  
 18 (January), (b) wet-to-dry transition period (April), and (c) dry season (May). The normalized signal  
 19 intensities from 400 Th to 800 Th are multiplied by a factor of 5 for better visualization.

20

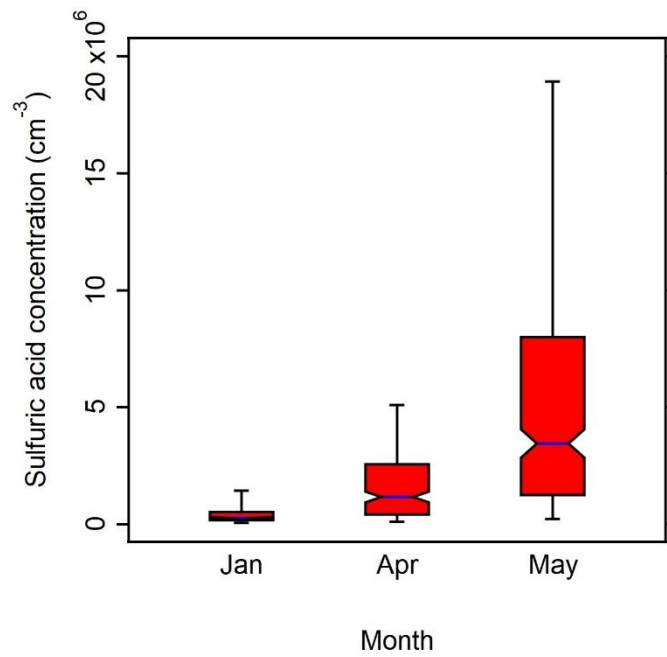

21

22 Figure S5 Daytime (07:00 – 19:00) neutral sulfuric acid concentrations measured with the CI-APi-TOF  
23 at the CHC during the study period when CI-APi-TOF data were available. Lower and upper limits of  
24 the error bars represent 25<sup>th</sup> and 75<sup>th</sup> percentiles, respectively.

25

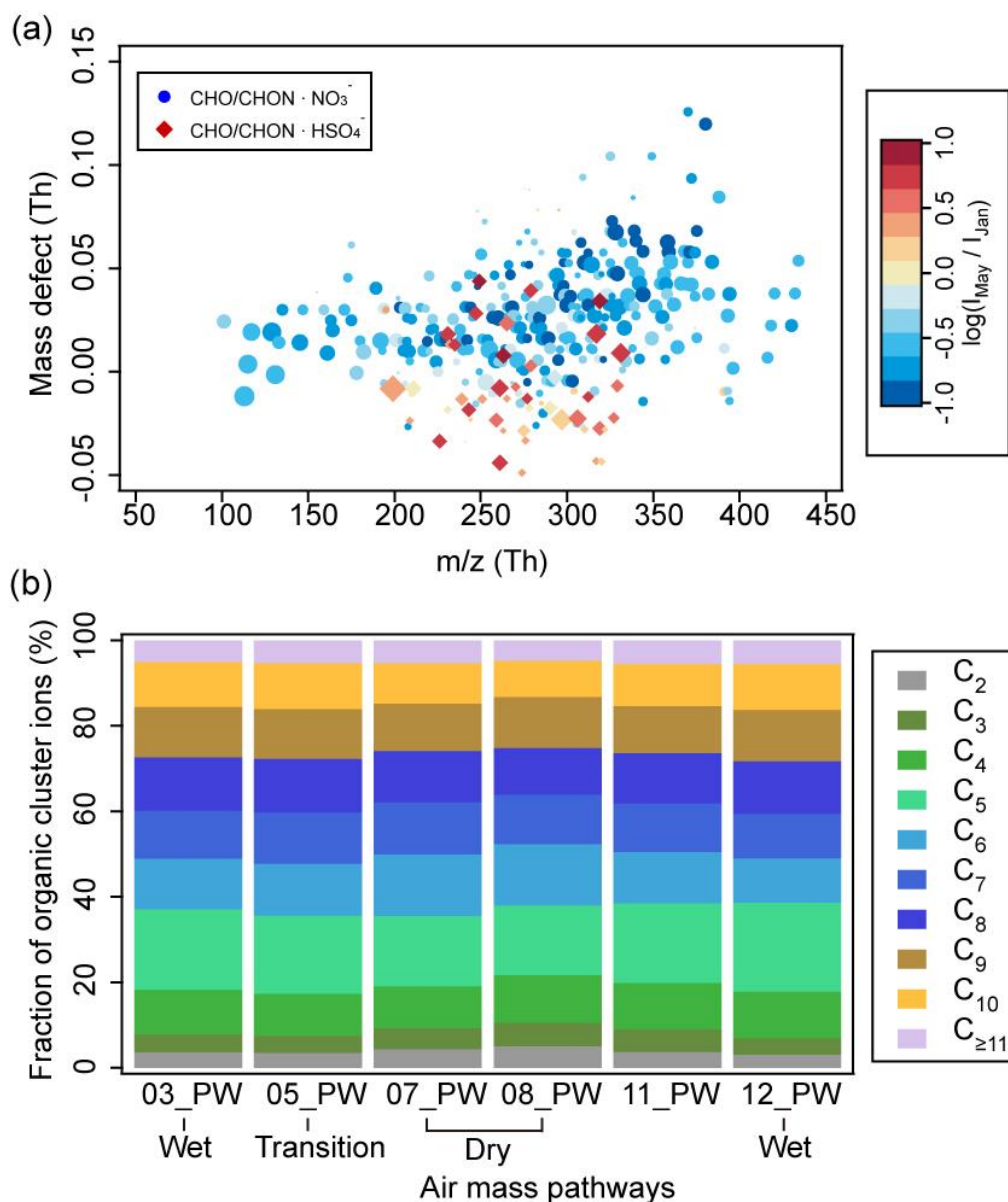

27

28 Figure S6 (a) Mass defect plot of organic cluster ions during daytime (07:00-19:00). The color code  
 29 indicates ratios (in log scale) between median signals of each ion detected in May ( $I_{\text{May}}$ ) of dry season  
 30 and January ( $I_{\text{Jan}}$ ) of wet season. The marker size is proportional to the log-transformed ion's median  
 31 signals in May. (b) Fraction of organic cluster ions from different air mass pathways as a function of  
 32 carbon atom numbers during daytime (07:00-19:00). Noted that MA-derived ions were not included in  
 33 both panels.

34

35

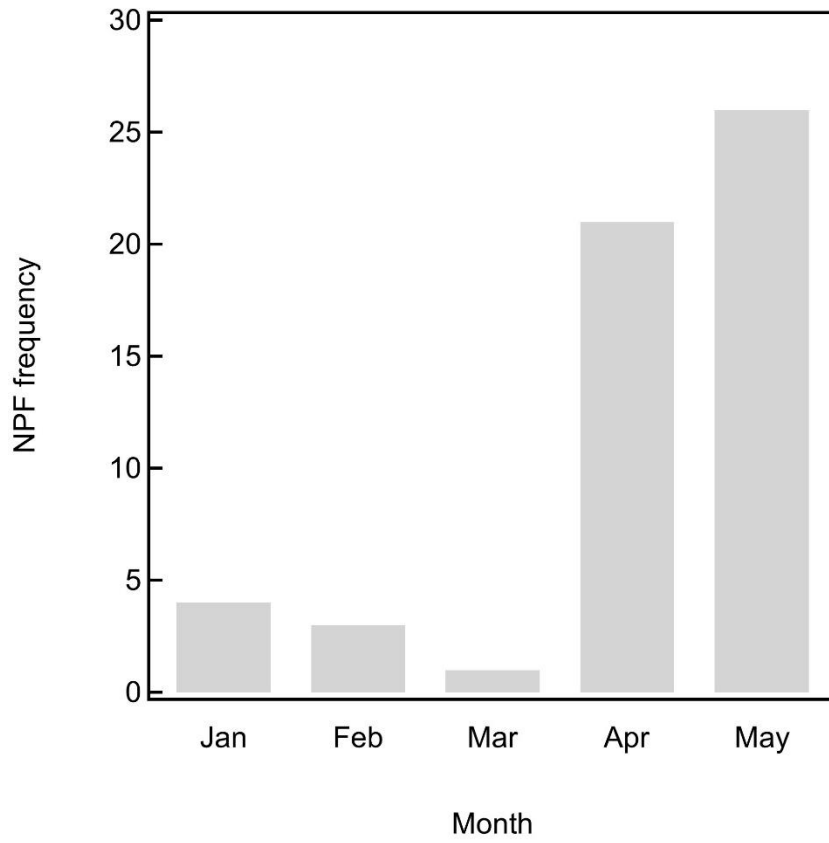

36

37 Figure S7 Frequency of NPF at the CHC from January to May 2018.

38

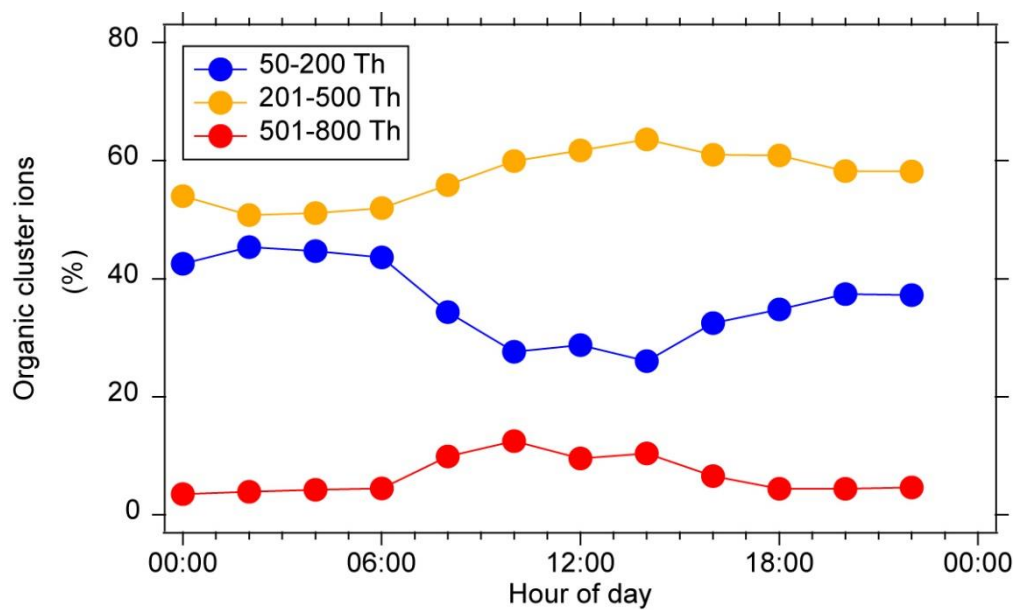

39

40 Figure S8 Variations of positive organic cluster ions in different mass ranges averaged during NPF events  
 41 in February and March 2018.

42
